# Supplementary material for: Toward interpretable LSTM-based modeling of hydrological systems
Source: Copernicus journal article supplement (doi:10.5194/hess-28-945-2024), 2024-02-27
Supplement: Supplementary file 1 [file hess-28-945-2024-supplement.pdf]

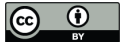

*Supplement of*

## **Toward interpretable LSTM-based modeling of hydrological systems**

**Luis Andres De la Fuente et al.**

*Correspondence to:* Luis Andres De la Fuente (ldelafue@arizona.edu)

The copyright of individual parts of the supplement might differ from the article licence.

5 Supplementary information: Weight distribution for the 10 catchments at linear scale.

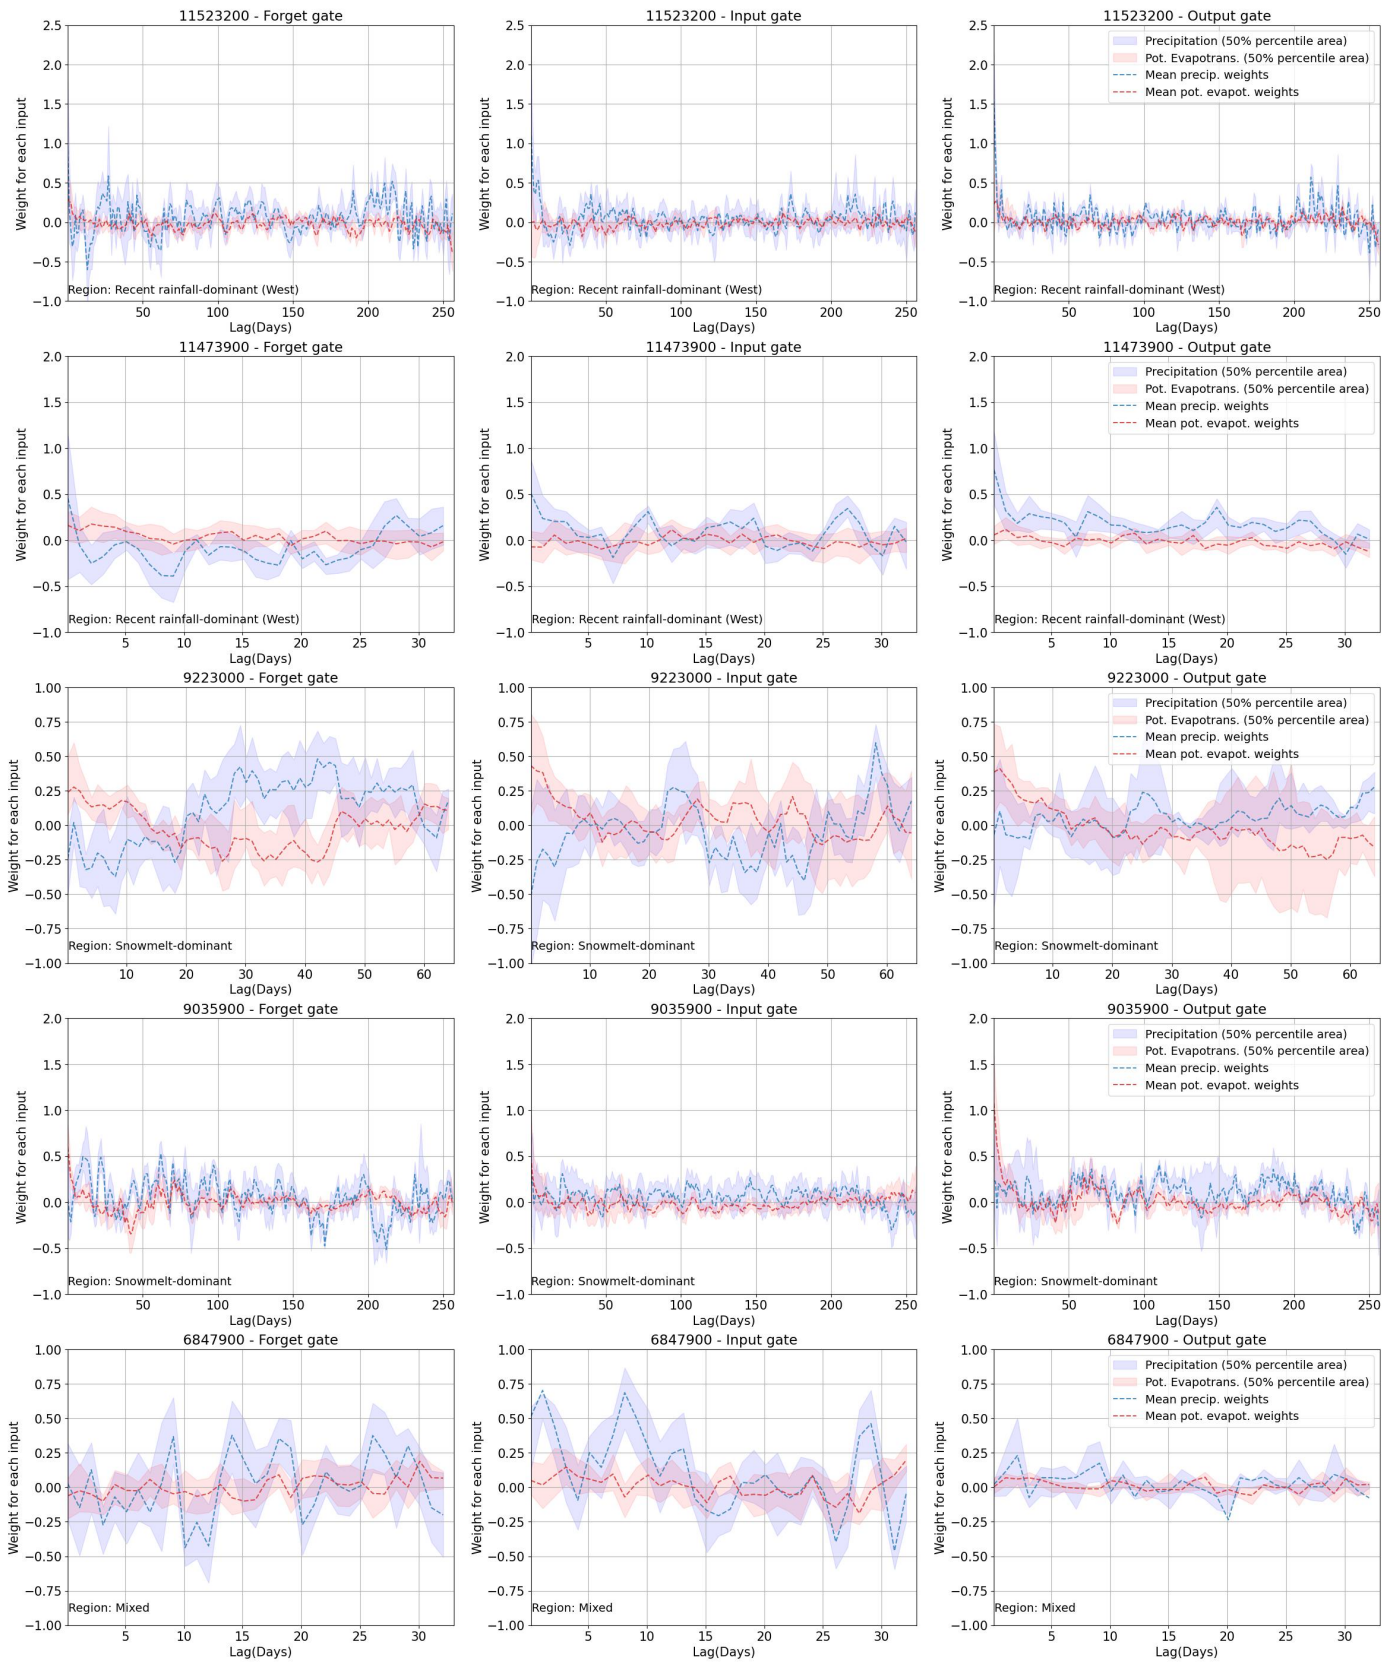

Figure S1: Weight distribution in the three gates for HydroLSTM. Each row represents a different catchment. The confidence interval is the result of running 20 models with random initialization.

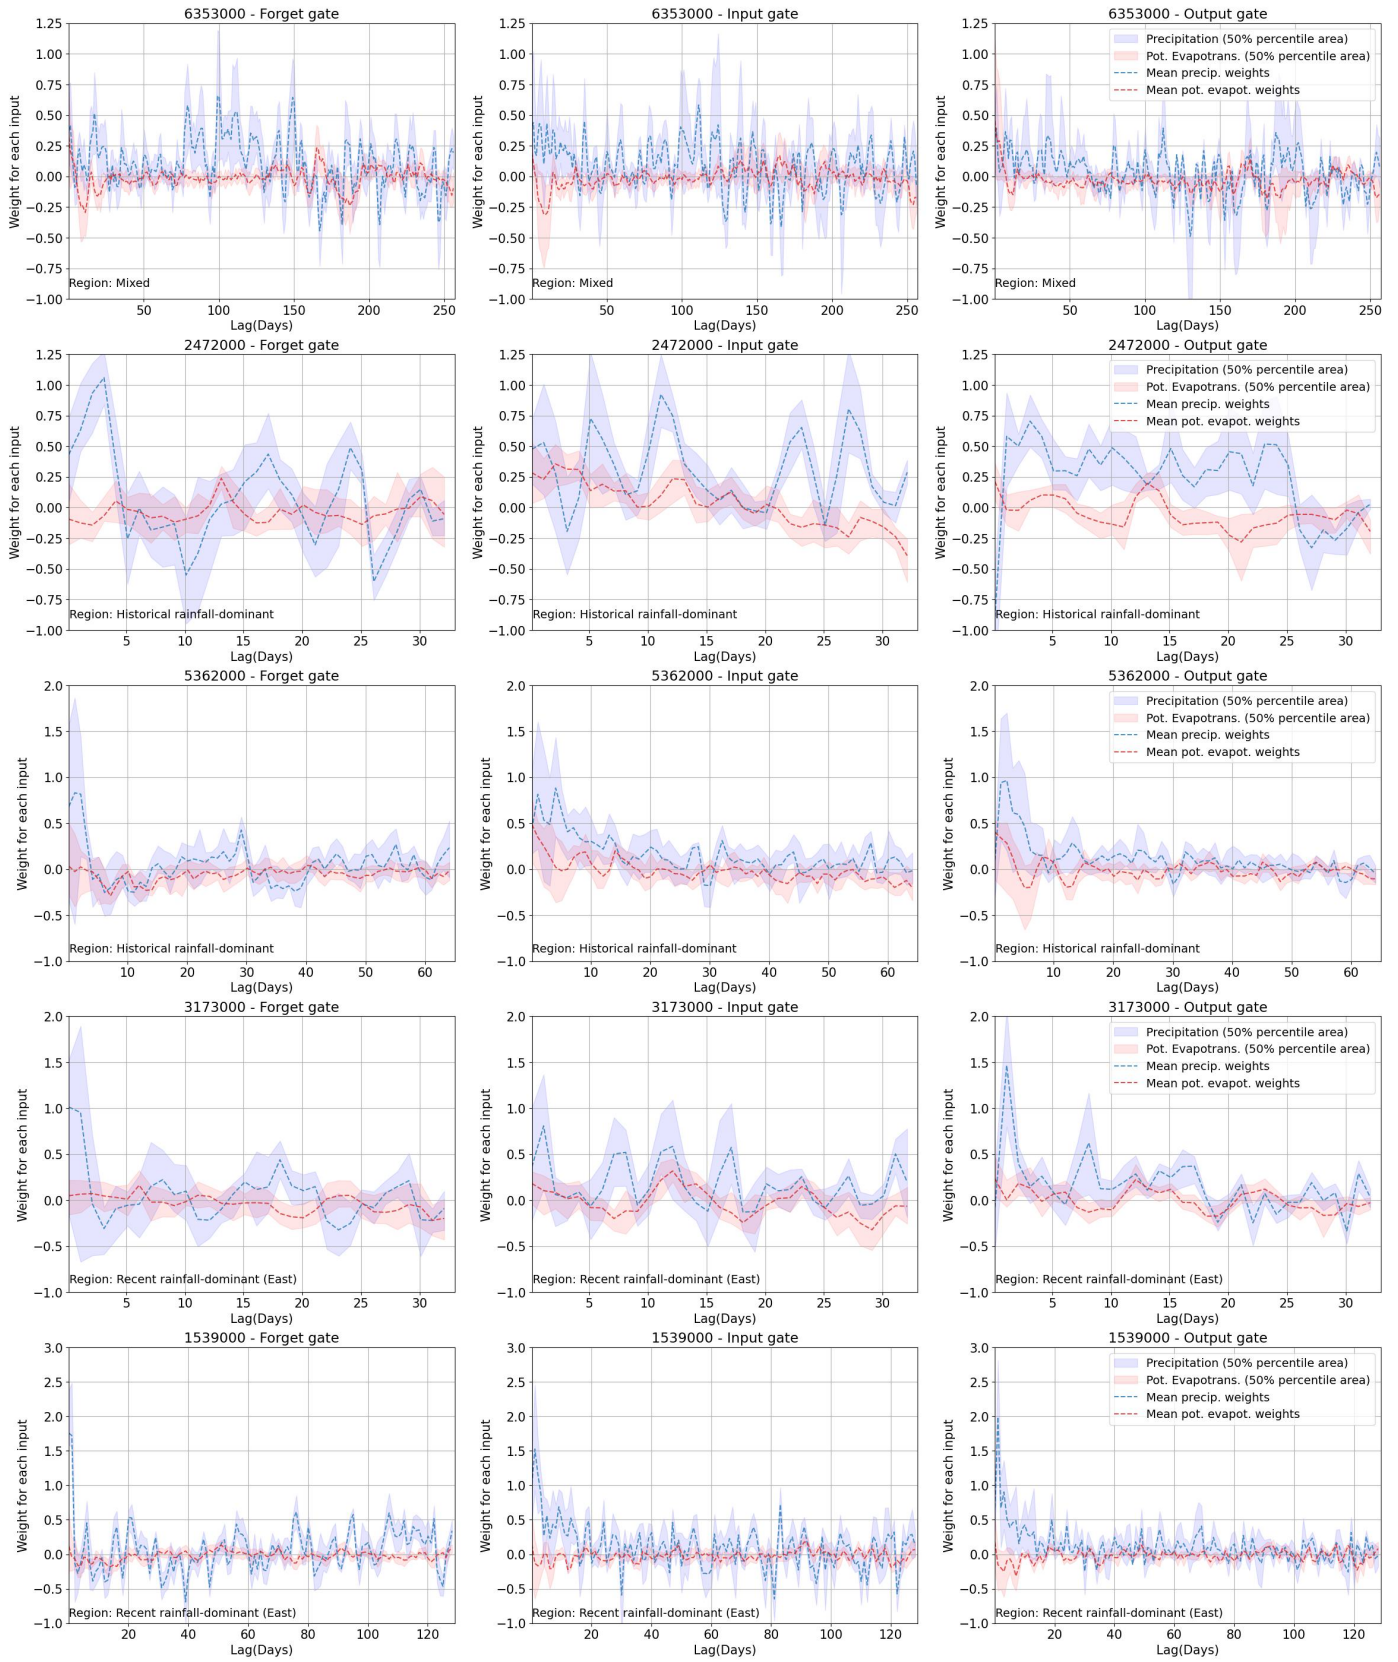

**Figure S2: Weight distribution in the three gates for HydroLSTM. Each row represents a different catchment. The confidence interval is the result of running 20 models with random initialization.**
